# Supplementary material for: Adjunctive Corticotherapy for Community Acquired Pneumonia: A Systematic Review and Meta-Analysis
Source: PubMed Central journal article supplement (PMC4671611; doi:10.1371/journal.pone.0144032), 2015-12-07

## S2 File. Detailed results for secondary outcomes

- Length of Stay, Meta-analysis of geometric mean in each arm

| Study                          | Control arm |                     |        | Intervention arm |                     |        |
|--------------------------------|-------------|---------------------|--------|------------------|---------------------|--------|
|                                | Size        | GM (95%CI)          | Weight | Size             | GM (95%CI)          | Weight |
| Confalonieri et al (2004)      | 23          | 17.4 (12.4 to 24.4) | 11.6%  | 23               | 17.5 (14.7 to 20.9) | 11.6%  |
| Mikami et al (2007)            | 16          | 12.8 (10.5 to 15.4) | 12.4%  | 15               | 10.2 (9.1 to 11.3)  | 12.6%  |
| Snijders et al (2010)          | 109         | 6.8 (5.7 to 8.0)    | 12.5%  | 104              | 6.4 (5.4 to 7.6)    | 11.7%  |
| Fernández-Serrano et al (2011) | 22          | 12.5 (9.9 to 15.7)  | 12.3%  | 23               | 10.5 (9.4 to 11.9)  | 12.5%  |
| Meijvis et al (2011)           | 153         | 7.7 (7.0 to 8.4)    | 12.8%  | 151              | 6.6 (6.2 to 7.1)    | 13.0%  |
| Nafae et al (2013)             | 20          | 16.3 (16.2 to 16.5) | 12.9%  | 60               | 9.0 (8.8 to 9.1)    | 13.2%  |
| Blum et al (2015)              | 393         | 6.8 (6.3 to 7.3)    | 12.8%  | 392              | 6.0 (5.7 to 6.4)    | 13.0%  |
| Torres et al (2015)            | 59          | 10.8 (9.6 to 12.2)  | 12.7%  | 61               | 10.5 (9.3 to 11.8)  | 12.5%  |
| Pooled (random effects)        |             | 10.6 (7.4 to 15.3)  |        |                  | 9.0 (7.6 to 10.7)   |        |
| I-squared                      |             | 99.3%               |        |                  | 97.8%               |        |

The pooled geometric mean of the length of stay was 10.6 days (95%CI 7.4 to 15.3) in control arm and 9.0 days (95% 7.6 to 10.7) in intervention arm.

- Time to Clinical Stability, geometric Mean ratio, forest plot

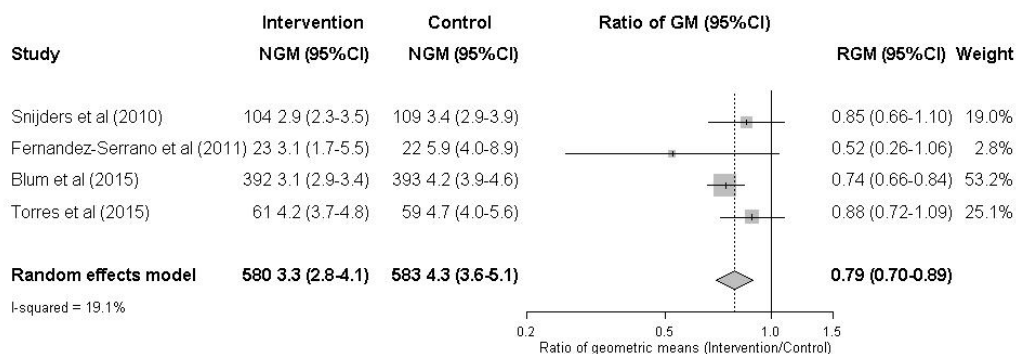

- Time to clinical stability, meta-analysis of geometric mean in each arm

| Study                          | Control arm |                     |        | Intervention arm |                     |        |
|--------------------------------|-------------|---------------------|--------|------------------|---------------------|--------|
|                                | Size        | GM (95%CI)          | Weight | Size             | GM (95%CI)          | Weight |
| Blum et al (2015)              | 393         | 4.22 (3.85 to 4.64) | 32.0%  | 392              | 3.13 (2.90 to 3.38) | 34.6%  |
| Fernández-Serrano et al (2011) | 22          | 5.94 (4.00 to 8.85) | 12.5%  | 23               | 3.11 (1.74 to 5.54) | 8.4%   |
| Snijders et al (2010)          | 109         | 3.36 (2.92 to 3.87) | 28.6%  | 104              | 2.86 (2.33 to 3.52) | 25.7%  |
| Torres et al (2015)            | 59          | 4.72 (4.00 to 5.56) | 26.9%  | 61               | 4.16 (3.65 to 4.75) | 31.2%  |
| Pooled (random effects)        |             | 4.25 (3.57 to 5.07) |        |                  | 3.34 (2.76 to 4.05) |        |
| I-squared                      |             | 78.7%               |        |                  | 80.5%               |        |

- Severe complications, forest plot

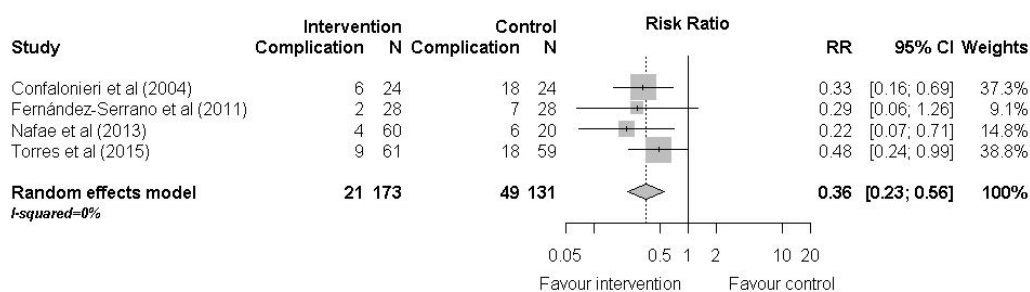

- Need for vasopressors, forest plot

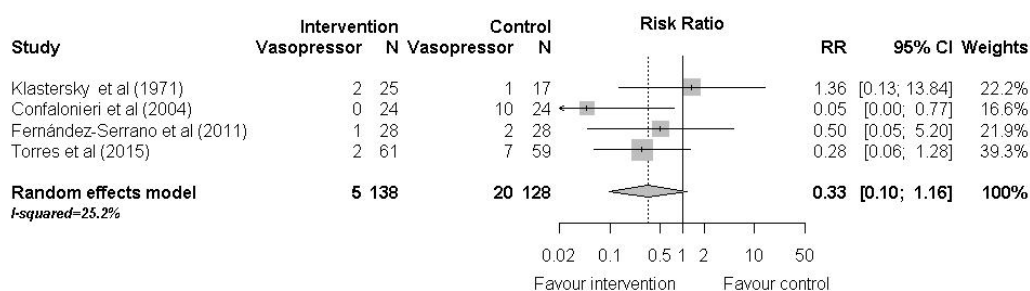

• Need for mechanical Ventilation, forest plot

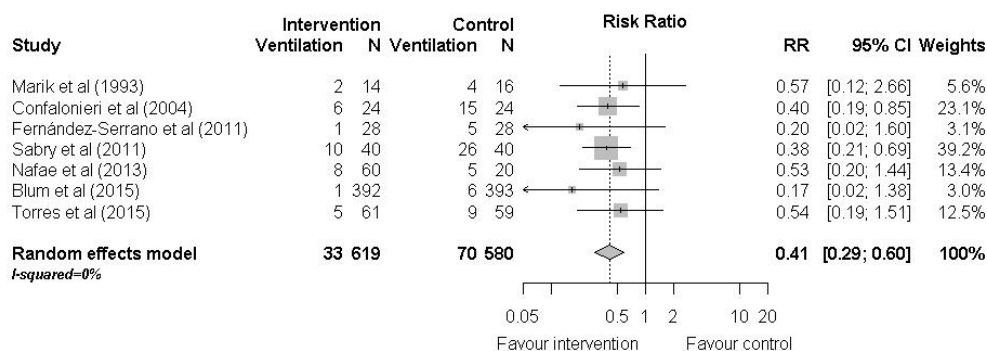

• Hyperglycemia, forest plot

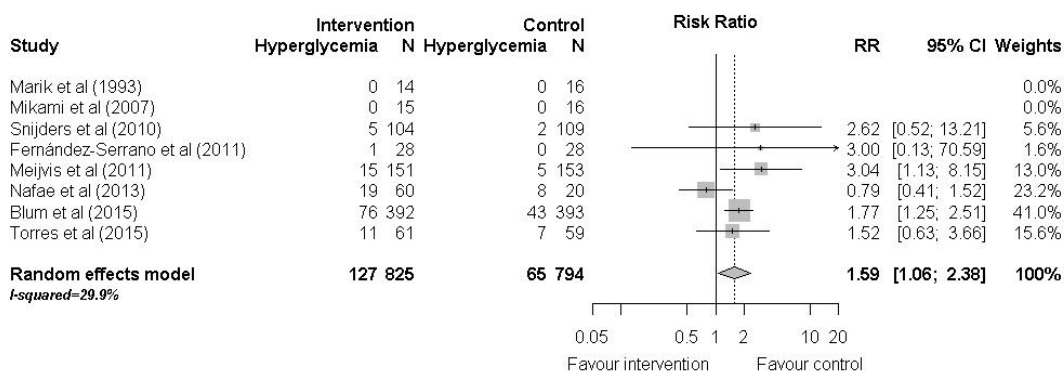

• Gastro-intestinal bleeding, forest plot

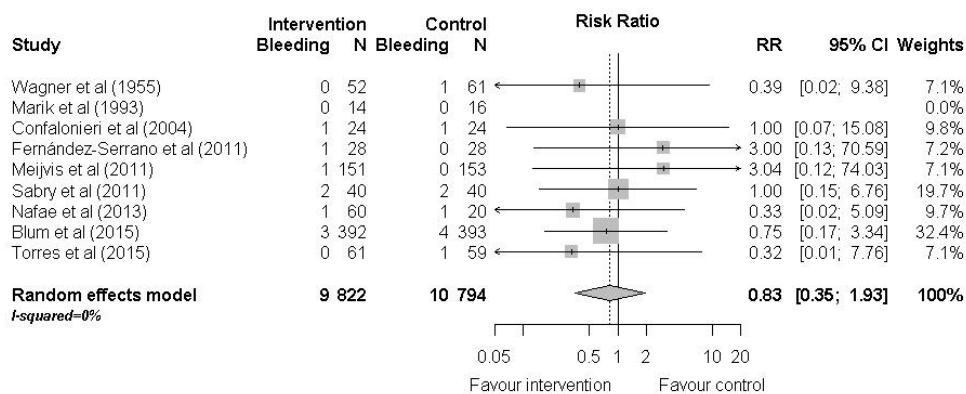

Supplement: pone.0144032.s002.pdf [file pone.0144032.s002.pdf]
