# Supplementary material for: Adjunctive Corticotherapy for Community Acquired Pneumonia: A Systematic Review and Meta-Analysis
Source: PubMed Central journal article supplement (PMC4671611; doi:10.1371/journal.pone.0144032), 2015-12-07
Supplement: pone.0144032.s003.pdf [file pone.0144032.s003.pdf]

### S3 File: Subgroup and sensitivity analyses

- Sub-groups analyses and meta-regressions for mortality

| Sub-groups     | Nb Studies | Pooled RR           | p-value | I-square | Comparison p-value* |
|----------------|------------|---------------------|---------|----------|---------------------|
| Severity       |            |                     |         |          |                     |
| Mixed severity | 8          | 1.04 (0.66 to 1.64) | 0.8765  | 43.5%    | 0.0672              |
| SCAP           | 5          | 0.47 (0.23 to 0.96) | 0.038   | 0.0%     |                     |
| Dose           |            |                     |         |          |                     |
| ≤50            | 7          | 1.11 (0.78 to 1.58) | 0.5577  | 0.0%     | 0.1871              |
| >50            | 6          | 0.54 (0.20 to 1.49) | 0.233   | 67.4%    |                     |
| Duration       |            |                     |         |          |                     |
| ≤5 days        | 4          | 1.12 (0.56 to 2.24) | 0.7566  | 38.0%    | 0.3473              |
| >5 days        | 8          | 0.72 (0.40 to 1.31) | 0.2796  | 51.9%    |                     |

\*: p-value for between sub-groups comparisons

|                               | Ratio de RR         | p-values |
|-------------------------------|---------------------|----------|
| Univariate meta-regression    |                     |          |
| Mixed severity / SCAP         | 0.42 (0.17 to 1.09) | 0.0744   |
| High dose / Low dose          | 0.60 (0.25 to 1.47) | 0.2676   |
| Long / short duration         | 0.65 (0.24 to 1.73) | 0.3895   |
| Multivariable meta-regression |                     |          |
| High dose / Low dose          | 0.47 (0.18 to 1.22) | 0.1227   |
| Long / short duration         | 0.53 (0.20 to 1.40) | 0.1991   |

- Leave-one-out sensitivity analyses

#### Mortality

| Outcome          | Study removed                  | Pooled RR (95%CI)          | p-value       | I-square (%) |
|------------------|--------------------------------|----------------------------|---------------|--------------|
| <b>Mortality</b> | <b>All studies</b>             | <b>0.84 (0.55 to 1.29)</b> | <b>0.4296</b> | <b>40.9%</b> |
| Mortality        | Wagner et al (1955)            | 0.83 (0.53 to 1.29)        | 0.4039        | 45.8         |
| Mortality        | Bennett et al (1963)           | 0.76 (0.48 to 1.21)        | 0.2538        | 37.3         |
| Mortality        | Klastersky et al (1971)        | 0.77 (0.51 to 1.15)        | 0.1963        | 29.0         |
| Mortality        | McHardy et al (1972)           | 0.84 (0.54 to 1.33)        | 0.4657        | 45.3         |
| Mortality        | Marik et al (1993)             | 0.86 (0.56 to 1.33)        | 0.5079        | 43.7         |
| Mortality        | Confalonieri et al (2004)      | 0.91 (0.62 to 1.34)        | 0.6338        | 33.0         |
| Mortality        | Snijders et al (2010)          | 0.81 (0.51 to 1.29)        | 0.3797        | 45.9         |
| Mortality        | Fernández-Serrano et al (2011) | 0.83 (0.54 to 1.29)        | 0.4128        | 45.8         |
| Mortality        | Meijvis et al (2011)           | 0.83 (0.51 to 1.33)        | 0.4356        | 45.6         |
| Mortality        | Sabry et al (2011)             | 0.9 (0.59 to 1.37)         | 0.6123        | 40.0         |
| Mortality        | Nafae et al (2013)             | 1.01 (0.7 to 1.45)         | 0.9772        | 20.6         |

|                                  |                                |                            |               |              |
|----------------------------------|--------------------------------|----------------------------|---------------|--------------|
| Mortality                        | Blum et al (2015)              | 0.78 (0.48 to 1.26)        | 0.3117        | 44.8         |
| Mortality                        | Torres et al (2015)            | 0.86 (0.54 to 1.36)        | 0.5165        | 43.9         |
| <b>Mortality - MixedSeverity</b> | <b>All studies</b>             | <b>1.04 (0.66 to 1.64)</b> | <b>0.8765</b> | <b>43.5%</b> |
| Mortality - MixedSeverity        | Wagner et al (1955)            | 1.03 (0.63 to 1.67)        | 0.9190        | 51.6         |
| Mortality - MixedSeverity        | Bennett et al (1963)           | 0.94 (0.54 to 1.64)        | 0.8347        | 46.9         |
| Mortality - MixedSeverity        | Klastersky et al (1971)        | 0.92 (0.59 to 1.43)        | 0.7077        | 32.0         |
| Mortality - MixedSeverity        | McHardy et al (1972)           | 1.07 (0.65 to 1.77)        | 0.7913        | 49.5         |
| Mortality - MixedSeverity        | Snijders et al (2010)          | 1.02 (0.61 to 1.72)        | 0.9338        | 51.6         |
| Mortality - MixedSeverity        | Meijvis et al (2011)           | 1.06 (0.63 to 1.81)        | 0.8176        | 49.4         |
| Mortality - MixedSeverity        | Nafae et al (2013)             | 1.27 (0.91 to 1.78)        | 0.1548        | 0.0          |
| Mortality - MixedSeverity        | Blum et al (2015)              | 0.98 (0.56 to 1.72)        | 0.9474        | 51.3         |
| <b>Mortality - SCAP</b>          | <b>All studies</b>             | <b>0.47 (0.23 to 0.96)</b> | <b>0.038</b>  | <b>0.0%</b>  |
| Mortality - SCAP                 | Marik et al (1993)             | 0.48 (0.22 to 1.04)        | 0.0636        | 3.1          |
| Mortality - SCAP                 | Confalonieri et al (2004)      | 0.54 (0.26 to 1.12)        | 0.0993        | 0.0          |
| Mortality - SCAP                 | Fernández-Serrano et al (2011) | 0.44 (0.21 to 0.93)        | 0.0316        | 0.0          |
| Mortality - SCAP                 | Sabry et al (2011)             | 0.52 (0.23 to 1.15)        | 0.1075        | 0.0          |
| Mortality - SCAP                 | Torres et al (2015)            | 0.32 (0.11 to 0.93)        | 0.0358        | 0.0          |

### GI Bleeding

| Outcome            | Study removed                  | Pooled RR (95%CI)          | p-value       | I-square (%) |
|--------------------|--------------------------------|----------------------------|---------------|--------------|
| <b>GI Bleeding</b> | <b>All studies</b>             | <b>0.83 (0.35 to 1.93)</b> | <b>0.6633</b> | <b>0.0%</b>  |
| GI Bleeding        | Wagner et al (1955)            | 0.88 (0.36 to 2.12)        | 0.7717        | 0.0          |
| GI Bleeding        | Marik et al (1993)             | 0.83 (0.35 to 1.93)        | 0.6576        | 0.0          |
| GI Bleeding        | Confalonieri et al (2004)      | 0.81 (0.33 to 1.98)        | 0.6408        | 0.0          |
| GI Bleeding        | Fernández-Serrano et al (2011) | 0.75 (0.31 to 1.80)        | 0.5154        | 0.0          |
| GI Bleeding        | Meijvis et al (2011)           | 0.75 (0.31 to 1.80)        | 0.5173        | 0.0          |
| GI Bleeding        | Sabry et al (2011)             | 0.79 (0.31 to 2.03)        | 0.6208        | 0.0          |
| GI Bleeding        | Nafae et al (2013)             | 0.91 (0.37 to 2.22)        | 0.8358        | 0.0          |
| GI Bleeding        | Blum et al (2015)              | 0.86 (0.31 to 2.43)        | 0.7800        | 0.0          |
| GI Bleeding        | Torres et al (2015)            | 0.89 (0.37 to 2.14)        | 0.7884        | 0.0          |

### Hyperglycemia

| Outcome              | Study removed                  | Pooled RR (95%CI)          | p-value       | I-square (%) |
|----------------------|--------------------------------|----------------------------|---------------|--------------|
| <b>Hyperglycemia</b> | <b>All studies</b>             | <b>1.59 (0.06 to 2.38)</b> | <b>0.0248</b> | <b>29.9%</b> |
| Hyperglycemia        | Marik et al (1993)             | 1.59 (1.06 to 2.38)        | 0.0248        | 29.9         |
| Hyperglycemia        | Mikami et al (2007)            | 1.59 (1.06 to 2.38)        | 0.0248        | 29.9         |
| Hyperglycemia        | Snijders et al (2010)          | 1.54 (0.98 to 2.42)        | 0.0593        | 40.8         |
| Hyperglycemia        | Fernández-Serrano et al (2011) | 1.58 (1.01 to 2.46)        | 0.0433        | 42.5         |
| Hyperglycemia        | Meijvis et al (2011)           | 1.45 (0.96 to 2.17)        | 0.0747        | 24.8         |
| Hyperglycemia        | Nafae et al (2013)             | 1.86 (1.38 to 2.51)        | <0.0001       | 0.0          |
| Hyperglycemia        | Blum et al (2015)              | 1.56 (0.83 to 2.94)        | 0.1662        | 39.3         |
| Hyperglycemia        | Torres et al (2015)            | 1.63 (0.97 to 2.74)        | 0.0672        | 43.9         |

**Mechanical ventilation**

| <b>Outcome</b>                | <b>Study removed</b>           | <b>Pooled RR (95%CI)</b>   | <b>p-value</b>    | <b>I-square (%)</b> |
|-------------------------------|--------------------------------|----------------------------|-------------------|---------------------|
| <b>Mechanical ventilation</b> | <b>All studies</b>             | <b>0.41 (0.29 to 0.60)</b> | <b>&lt;0.0001</b> | <b>0.0%</b>         |
| Mechanical ventilation        | Marik et al (1993)             | 0.41 (0.28 to 0.59)        | <0.0001           | 0.0                 |
| Mechanical ventilation        | Confalonieri et al (2004)      | 0.42 (0.28 to 0.63)        | <0.0001           | 0.0                 |
| Mechanical ventilation        | Fernández-Serrano et al (2011) | 0.42 (0.29 to 0.61)        | <0.0001           | 0.0                 |
| Mechanical ventilation        | Sabry et al (2011)             | 0.43 (0.27 to 0.69)        | 0.0005            | 0.0                 |
| Mechanical ventilation        | Nafae et al (2013)             | 0.40 (0.27 to 0.59)        | <0.0001           | 0.0                 |
| Mechanical ventilation        | Blum et al (2015)              | 0.43 (0.29 to 0.62)        | <0.0001           | 0.0                 |
| Mechanical ventilation        | Torres et al (2015)            | 0.40 (0.27 to 0.59)        | <0.0001           | 0.0                 |

**Needs vasopressor**

| <b>Outcome</b>           | <b>Study removed</b>           | <b>Pooled RR (95%CI)</b>   | <b>p-value</b> | <b>I-square (%)</b> |
|--------------------------|--------------------------------|----------------------------|----------------|---------------------|
| <b>Needs vasopressor</b> | <b>All studies</b>             | <b>0.33 (0.10 to 1.17)</b> | <b>0.0847</b>  | <b>25.2%</b>        |
| Needs vasopressor        | Klastersky et al (1971)        | 0.23 (0.07 to 0.80)        | 0.0211         | 9.0                 |
| Needs vasopressor        | Confalonieri et al (2004)      | 0.46 (0.15 to 1.41)        | 0.1740         | 0.0                 |
| Needs vasopressor        | Fernández-Serrano et al (2011) | 0.29 (0.05 to 1.65)        | 0.1628         | 48.3                |
| Needs vasopressor        | Torres et al (2015)            | 0.35 (0.04 to 2.84)        | 0.3289         | 53.0                |

**Severe complication**

| <b>Outcome</b>             | <b>Study removed</b>           | <b>Pooled RR (95%CI)</b>   | <b>p-value</b>    | <b>I-square (%)</b> |
|----------------------------|--------------------------------|----------------------------|-------------------|---------------------|
| <b>Severe complication</b> | <b>All studies</b>             | <b>0.36 (0.23 to 0.56)</b> | <b>&lt;0.0001</b> | <b>0.0%</b>         |
| Severe complication        | Confalonieri et al (2004)      | 0.37 (0.21 to 0.66)        | 0.0006            | 0.0                 |
| Severe complication        | Fernández-Serrano et al (2011) | 0.37 (0.23 to 0.58)        | <0.0001           | 0.0                 |
| Severe complication        | Nafae et al (2013)             | 0.39 (0.24 to 0.63)        | 0.0001            | 0.0                 |
| Severe complication        | Torres et al (2015)            | 0.30 (0.17 to 0.52)        | <0.0001           | 0.0                 |

**Time to clinical stability**

| <b>Study removed</b>           | <b>Pooled RGM * (95%CI)</b> | <b>P-value</b> | <b>I-squared</b> |
|--------------------------------|-----------------------------|----------------|------------------|
| Blum et al (2015)              | 0.848 (0.725 to 0.992)      | 0.0397         | 0.0%             |
| Fernández-Serrano et al (2011) | 0.794 (0.708 to 0.889)      | <0.0001        | 18.4%            |
| Snijders et al (2010)          | 0.775 (0.658 to 0.913)      | 0.0023         | 36.3%            |
| Torres et al (2015)            | 0.755 (0.676 to 0.843)      | <0.0001        | 1.5%             |

**Length of stay**

| <b>Study removed</b>           | <b>Pooled RGM * (95%CI)</b> | <b>P-value</b>    | <b>I-squared</b> |
|--------------------------------|-----------------------------|-------------------|------------------|
| Confalonieri et al (2004)      | 0.82 (0.64 to 1.06)         | 0.1272            | 97.3%            |
| Mikami et al (2007)            | 0.82 (0.64 to 1.06)         | 0.2072            | 97.3%            |
| Snijders et al (2010)          | 0.82 (0.64 to 1.06)         | 0.1383            | 97.2%            |
| Fernández-Serrano et al (2011) | 0.84 (0.65 to 1.09)         | 0.1798            | 97.3%            |
| Meijvis et al (2011)           | 0.84 (0.64 to 1.09)         | 0.1839            | 96.7%            |
| <b>Nafae et al (2013)</b>      | <b>0.89 (0.84 to 0.94)</b>  | <b>&lt;0.0001</b> | <b>0.0%</b>      |
| Blum et al (2015)              | 0.83 (0.64 to 1.08)         | 0.1623            | 95.9%            |
| Torres et al (2015)            | 0.82 (0.64 to 1.06)         | 0.1228            | 96.9%            |

- **Exclusion of older studies (Klustersky, Wagner, Benett and Mc hardy)**

| Mantel-Haenszel - Random |            |                     |         |           |           |
|--------------------------|------------|---------------------|---------|-----------|-----------|
| Outcome                  | Nb studies | Pooled RR (95%CI)   | p-value | I-squared |           |
| Mortality                | 9          | 0.64 (0.40 to 1.04) | 0.0714  | 26.5%     |           |
| GI Bleeding              | 7          | 0.88 (0.36 to 2.12) | 0.7708  | 0.0%      |           |
| Hyperglycemia            | 6          | 1.59 (1.06 to 2.38) | 0.0248  | 29.9%     | Unchanged |
| Mechanical ventilation   | 7          | 0.41 (0.29 to 0.60) | <0.0001 | 0.0%      | Unchanged |
| Needs Vasopressor        | 3          | 0.23 (0.07 to 0.80) | 0.0211  | 9.0%      |           |
| Severe complication      | 4          | 0.36 (0.23 to 0.56) | <0.0001 | 0.0%      | Unchanged |

- Exclusion of studies with higher risk of bias

|                                            | Not good quality (JADAD≤3)           | Good quality (JADAD>3)                | p for comparison good vs not good quality) |
|--------------------------------------------|--------------------------------------|---------------------------------------|--------------------------------------------|
| <b>Mortality</b>                           |                                      |                                       |                                            |
| Nb studies                                 | 4                                    | 9                                     |                                            |
| Pooled RR                                  | 0.64 (0.19 to 2.13), I2=75%, p=0.47  | 1.03 (0.73 to 1.44), I2=0%, p=0.87    | 0.46                                       |
| <b>Mortality in mixed severity studies</b> |                                      |                                       |                                            |
| Nb studies                                 | 3                                    | 5                                     |                                            |
| Pooled RR                                  | 0.77 (0.18 to 3.34), I2=81%, p=0.72  | 1.19 (0.82 to 1.74), I2=0%, p=0.35    | 0.57                                       |
| <b>Mortality in SCAP studies</b>           |                                      |                                       |                                            |
| Nb studies                                 | 1                                    | 4                                     |                                            |
| Pooled RR                                  | 0.33 (0.07 to 1.55), I2=NA, p=0.16   | 0.52 (0.23 to 1.15), I2=0%, p=0.11    | 0.62                                       |
| <b>GI Bleeding</b>                         |                                      |                                       |                                            |
| Nb studies                                 | 2                                    | 6                                     |                                            |
| Pooled RR                                  | 0.70 (0.15 to 3.33), I2=0%, p=0.65   | 0.89 (0.32 to 2.44), I2=0%, p=0.82    | 0.80                                       |
| <b>Hyperglycemia</b>                       |                                      |                                       |                                            |
| Nb studies                                 | 2                                    | 6                                     |                                            |
| Pooled RR                                  | 0.79 (0.41 to 1.52), I2=NA, p=0.48   | 1.86 (1.38 to 2.51), I2=0%, p<0.0001  | 0.02                                       |
| <b>Mechanical ventilation</b>              |                                      |                                       |                                            |
| Nb studies                                 | 2                                    | 5                                     |                                            |
| Pooled RR                                  | 0.42 (0.25 to 0.69), I2=0%, p=0.0007 | 0.41 (0.24 to 0.69), I2=0%, p=0.0009  | 0.95                                       |
| <b>Needs Vasopressor</b>                   |                                      |                                       |                                            |
| Nb studies                                 | 1                                    | 3                                     |                                            |
| Pooled RR                                  | 1.36 (0.13 to 13.84), I2=NA, p=0.80  | 0.23 (0.07 to 0.80), I2=9%, p=0.02    | 0.19                                       |
| <b>Severe complication</b>                 |                                      |                                       |                                            |
| Nb studies                                 | 1                                    | 3                                     |                                            |
| Pooled RR                                  | 0.22 (0.07 to 0.71), I2=NA, p=0.01   | 0.39 (0.24 to 0.63), I2=0%, p=0.0001  | 0.38                                       |
| <b>Time to clinical stability</b>          |                                      |                                       |                                            |
| Nb studies                                 | 0                                    | 4                                     |                                            |
| Pooled GMR                                 | /                                    | 0.79 (0.70 to 0.89), I2=19%, p<0.0001 | NA                                         |
| <b>Length of stay</b>                      |                                      |                                       |                                            |
| Nb studies                                 | 2                                    | 6                                     |                                            |
| Pooled GMR                                 | 1.54 (1.07 to 2.21), I2=91%, p=0.02  | 1.12 (1.05 to 1.19), I2=0%, p=0.0005  | 0.09                                       |

- Treatment effect estimate according to year of publication

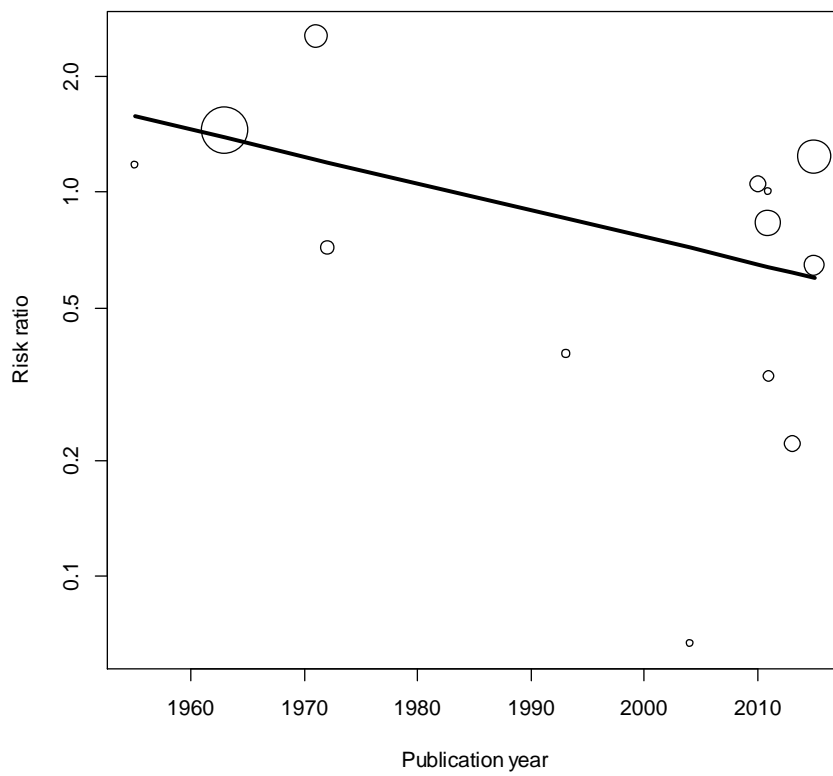

The logarithm of the relative risk is reduced by 0.16 (se 0.09) for every ten years (**p=0.0626**).
