# Supplementary material for: Adjunctive Corticotherapy for Community Acquired Pneumonia: A Systematic Review and Meta-Analysis
Source: PubMed Central journal article supplement (PMC4671611; doi:10.1371/journal.pone.0144032), 2015-12-07
Supplement: pone.0144032.s004.pdf [file pone.0144032.s004.pdf]

## S4 File. Publication bias

### Publication bias, funnel plots

- Length of stay

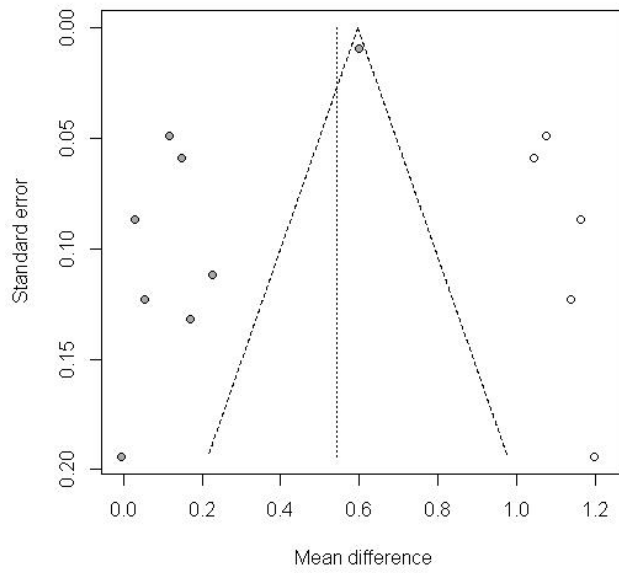

- **Severe complication**

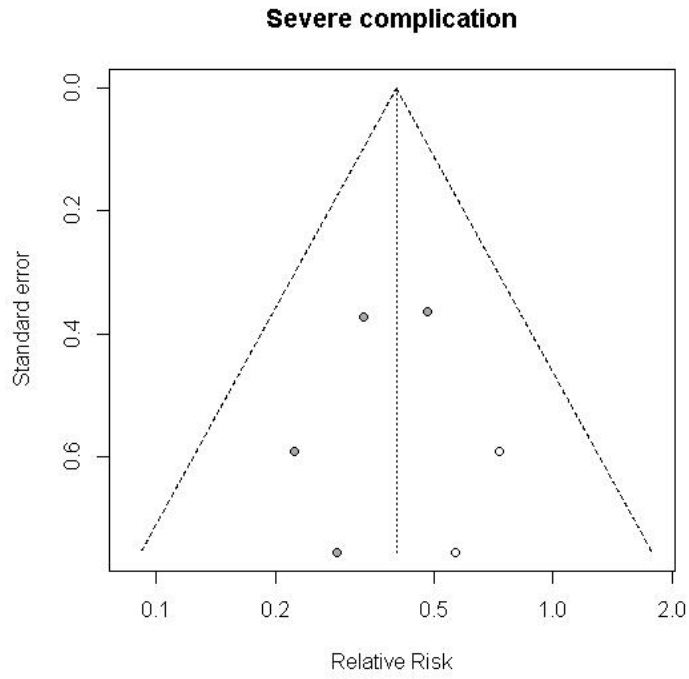

- **Need for vasopressors**

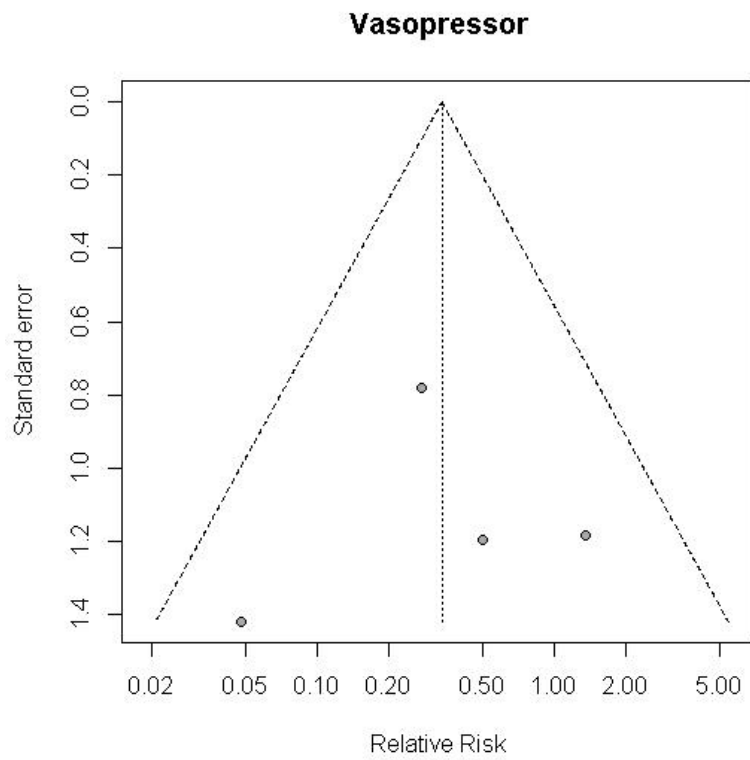

- **Need Mechanical ventilation**

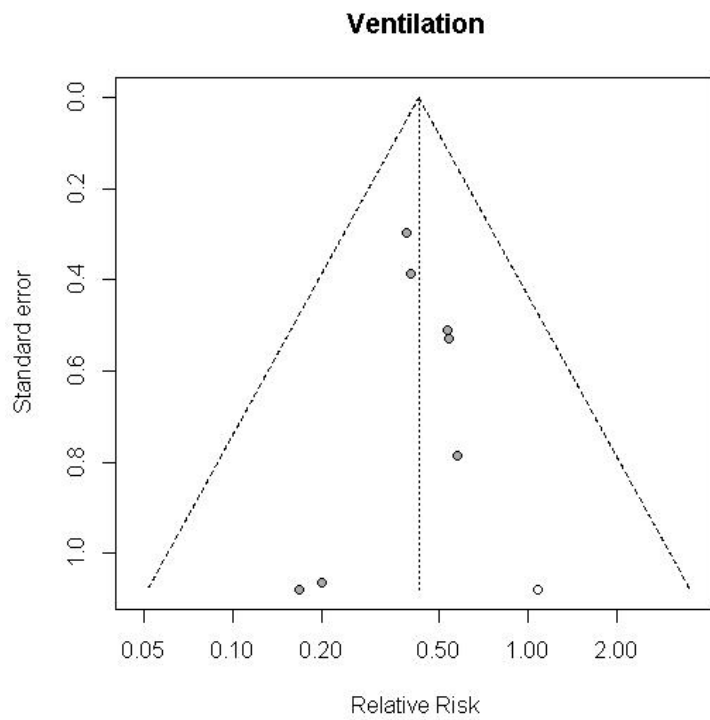

- **Hyperglycaemia**

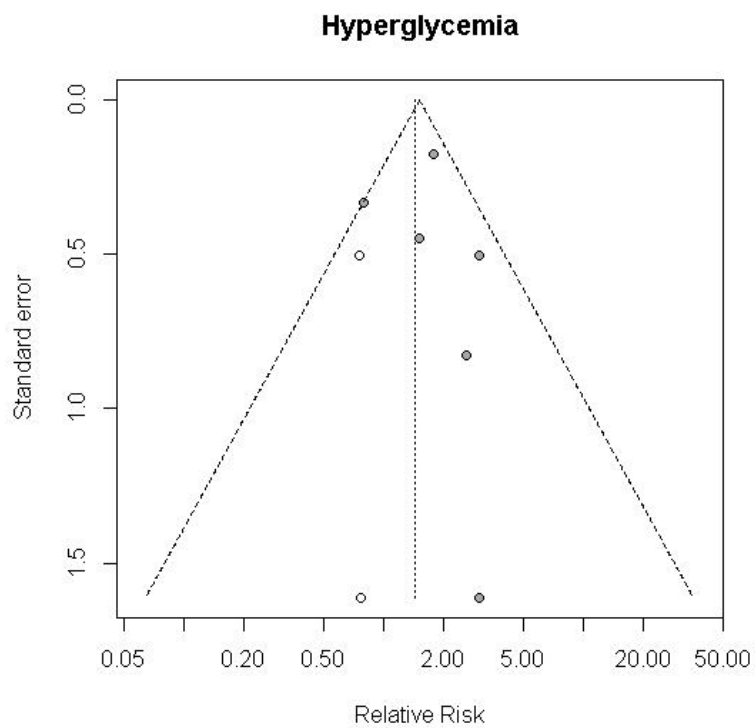

- **Gastro-intestinal bleeding**

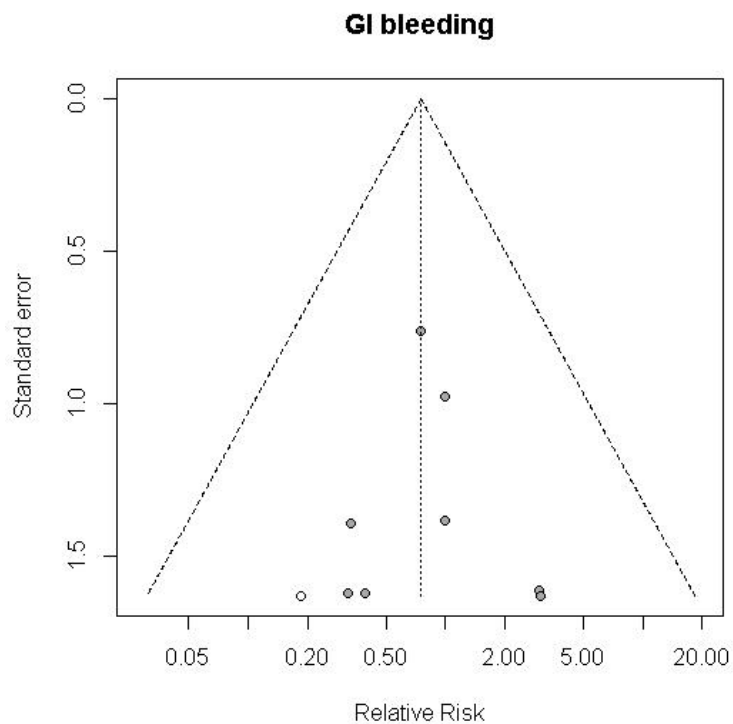

### Appendix Q. Publication bias, Trim & Fill, Egger's test

| Trim & Fill            |                     |         |              |           |              |
|------------------------|---------------------|---------|--------------|-----------|--------------|
| Outcome                | Pooled RR (95%CI)   | p-value | Egger's test | N missing | Side missing |
| Mortality              | 1.24 (0.78 to 1.97) | 0.3687  | 0.0517       | 5         | Right        |
| Mixed severity         | 1.32 (0.78 to 2.22) | 0.2950  | NA *         | 2         | Right        |
| SCAP                   | 0.54 (0.27 to 1.08) | 0.0815  | NA *         | 1         | Right        |
| GI Bleeding            | 0.75 (0.33 to 1.70) | 0.4924  | NA *         | 1         | Left         |
| Hyperglycemia          | 1.45 (1.00 to 2.09) | 0.0482  | NA *         | 2         | Left         |
| Mechanical ventilation | 0.43 (0.30 to 0.61) | <0.0001 | NA *         | 1         | Right        |
| Needs Vasopressor      | 0.33 (0.10 to 1.17) | 0.0847  | NA *         | 0         |              |
| Severe complication    | 0.40 (0.27 to 0.60) | <0.0001 | NA *         | 2         | Left         |

\*: not enough studies
